# Supplementary material
Source: publisher site journal article supplement (https://www.dovepress.com/article/244683)
Supplement: Supplementary file 1 [file get_supplementary_file.php]

**Figure S1.** Plasmid profiles of *C. freundii* L91. (A) Plasmid size determination by S1-PFGE, with *Salmonella enterica* serotype Braenderup H9812 as the size marker. (B) Southern blotting hybridization with a *bla*IMP-specific probe.


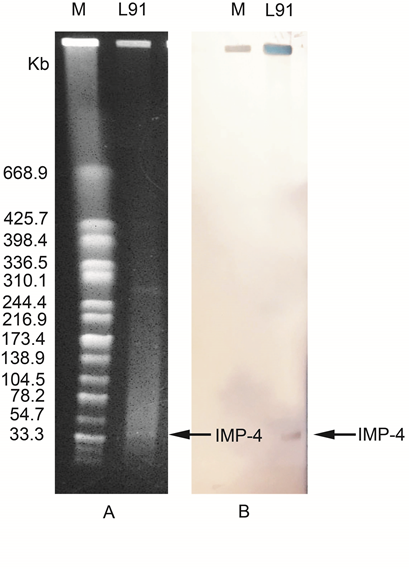


**Table S1. Genomic features of the *C. freundii* L91**

| Feature | Chromosome | PIMP-4-L91 | P1-L91 |
| --- | --- | --- | --- |
| Total number of bases (bp) | 4,951,125 | 51,042 | 304,128 |
| G+C content (%) | 51.9 | 50.7 | 48.9 |
| No. of protein-coding sequences | 4953 | 80 | 318 |
| No. of tRNA genes | 83 | 0 | 0 |
| Plasmid replicon type | - | IncN | - |
| Resistance genes | *qnr-B38, bla*CMY-109 | *blaIMP-4，qnrS1* | - |
| Accession numbers | SCVZ00000000 | SCVZ00000000 | SCVZ00000000 |
